# Supplementary material
Source: PubMed Central journal article supplement (PMC438995)

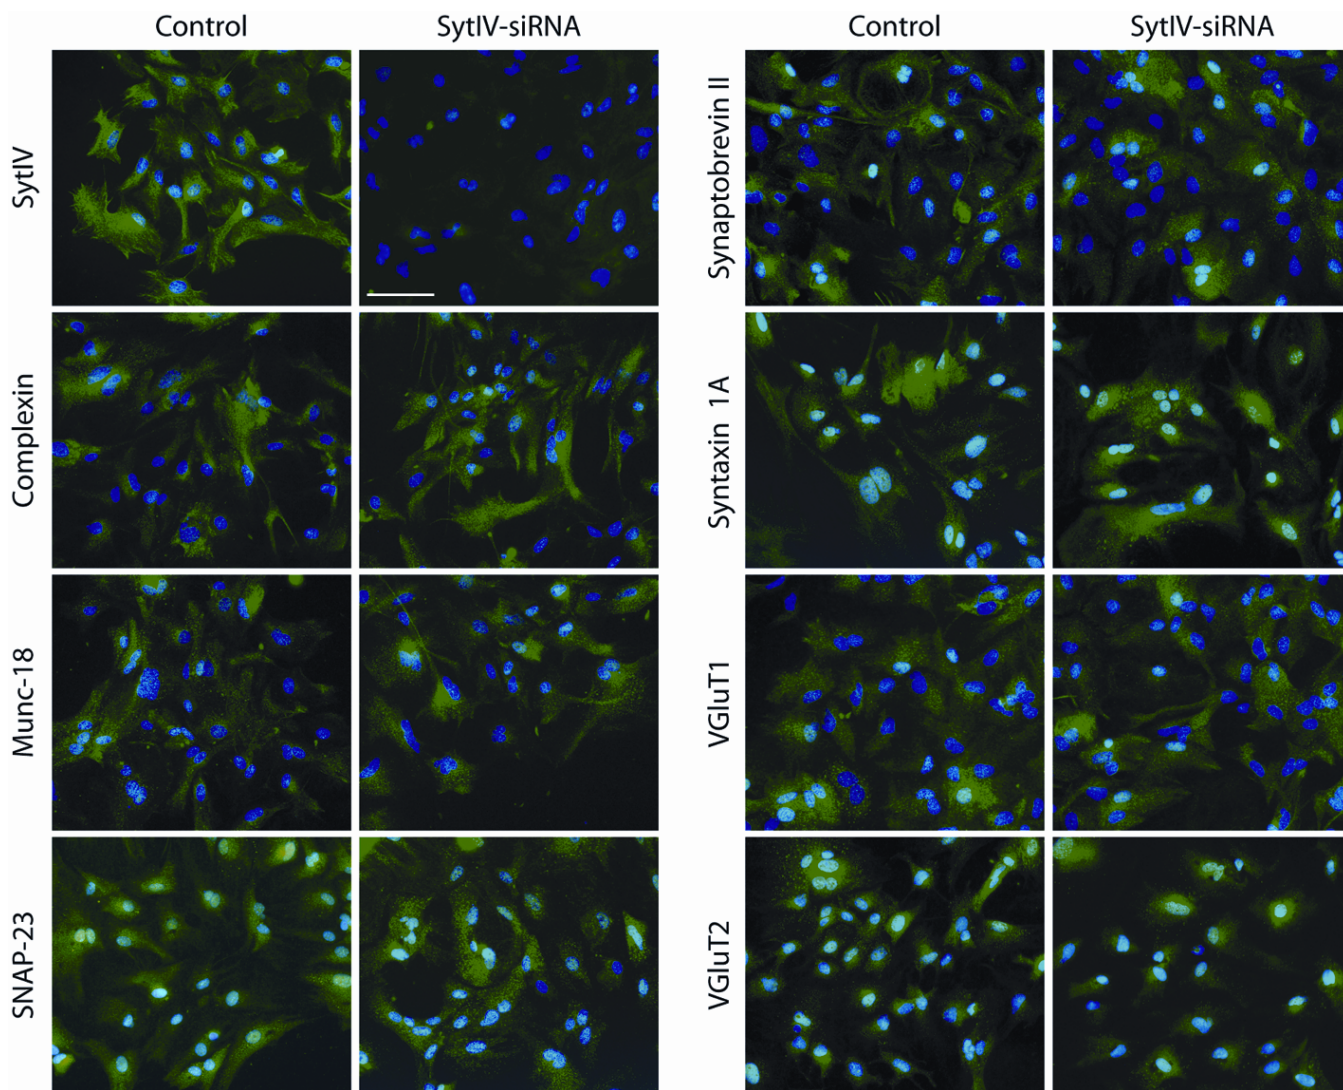

Supplement: pnas_101_25_9441__8.pdf [file pnas_101_25_9441__8.pdf]
